# Supplementary material
Source: PubMed Central journal article supplement (PMC5875387)
Supplement: jamapsychiatry-75-325-s001.pdf [file jamapsychiatry-75-325-s001.pdf]

# 1 Final Study Protocol and Analytical Plan

2 Principal/Investigator: Margarita Alegria

3 Protocol Title: Effectiveness of DECIDE in Patient-Provider Communication, Therapeutic Alliance and Care  
4 Continuation

5 Funding: PCORI - Patient Centered Outcomes Research Institute

## 6 I. Background and Significance

7 **I.A. Historical Background.** Most people with mental disorders in the United States are untreated or poorly  
8 treated.<sup>1</sup> Numerous researchers, government agencies, and advocates<sup>1-3</sup> call for interventions to enhance treatment  
9 initiation and quality. One way to improve quality and retention in mental health care is to implement shared  
10 decision making (SDM). When patients and providers engage in SDM, patients' preferences are taken into  
11 consideration for their treatment, resulting in more appropriate care, increased satisfaction, and ideally, better health  
12 outcomes.<sup>4,5</sup> Examining SDM in behavioral health care among populations in safety net settings is an urgent need  
13 given that the Federal Patient Protection and Affordable Care Act (ACA) will make an estimated 32 million  
14 uninsured individuals, mostly minorities, eligible for Medicaid coverage.<sup>6</sup> Roughly 20-30% of this population  
15 suffers from a behavioral health disorder.<sup>7</sup>

16 A major obstacle to SDM for patients of color is inadequate provider appreciation of minority patients' preferences  
17 for interpersonal relations.<sup>8,9</sup> Providers rarely receive training in how to motivate minority patients to voice their  
18 treatment concerns or preferences. Providers display fewer patient-centered behaviors,<sup>10</sup> are less receptive to  
19 question asking, and tend to demonstrate greater verbal dominance<sup>11</sup> with minorities than with white patients. These  
20 actions often result in misunderstandings, inadequate services, and failed treatment alliances.<sup>12</sup> Minority patients  
21 may infer prejudice or perceive a negative attitude from their provider, thus reducing the likelihood that they  
22 perceive receiving quality care.<sup>13</sup> Clinicians face new demands connecting with patients with different customs,  
23 values and experiences, and addressing these challenges will likely improve SDM and patient-centered quality care.  
24 Language barriers can also be detrimental;<sup>14</sup> patients who do not speak the same language as their providers report  
25 worse outcomes<sup>15</sup> and higher dropout rates.<sup>16-18</sup> Tackling these barriers requires new, innovative interventions at the  
26 provider and patient level.

27 **I. B. Previous clinical studies leading up to and supporting the proposed research.** In this proposal, we test the  
28 effectiveness of the DECIDE-PA+PC intervention among non-Latino white, African-American, Latino, and Asian  
29 patients in community health centers. Our research team's pilot and randomized trial found that a patient  
30 intervention (DECIDE-PA) improved activation and self-management in mental health care.<sup>19-22</sup> However, minority  
31 patients expressed concern that becoming 'activated' threatened the relationships they had developed with their  
32 providers. This feedback meshed with prior studies showing that providers working under strict time constraints and  
33 immediate treatment priorities may be more directive and limit patient-initiated talk.<sup>23</sup> In the DECIDE-PC  
34 intervention described in this protocol, we intended to tackle these barriers. We hypothesized that adding a provider  
35 component (DECIDE-PC) to the patient component (DECIDE-PA) would enhance providers' receptivity to  
36 patients' activation and self-management, improve therapeutic alliance and communication, and improve SDM and  
37 perceived quality of care.

38 The DECIDE-PA intervention (previously called RQP-MH) had its roots in a community-based social action  
39 intervention, the Right Question Project (RQP), which was designed to empower participants in social and health  
40 situations that required decision making. The DECIDE-PA intervention was a product of the collaboration between  
41 the non-profit group which created RQP (Rothstein and Santana), patients, clinicians, and administrators in mental  
42 health agencies, and the Disparities Research Unit (DRU), MGH team, which was previously the Center for  
43 Multicultural Mental Health Research (CMMHR) at Cambridge Health Alliance. Considerations of cultural, socio-  
44 economic, and clinical factors for patients were gleaned from stakeholder groups in the adaption of RQP to  
45 DECIDE-PA (see Polo et al. 2012 for details).<sup>12</sup> The continued engagement of patients, clinicians, and  
46 administrators in the DECIDE-PA+PC study was vital to ensure that the intervention continued to be relevant and  
47 meaningful for patients and to attain sustained improvements in patient care.

48 The current study was guided by principles of community-based research and was committed to ensure patients,  
49 clinicians, and clinic administrators had a purposeful voice in study design and implementation and dissemination of  
50 findings. By incorporating the diverse skills, knowledge and expertise of patients, providers and clinic  
51 administrators, the research was more likely to be useful and relevant to community members.<sup>24</sup> The research PI  
52 and team has an extensive and well-respected history of successful collaboration with patients, clinicians,  
53 administrators, and other stakeholders in innovative mental health services studies that aim to improve the lives of  
54 multicultural populations. The unique collaborative nature of the research center was evident in the conduct of the  
55 DECIDE-PA study. We continued to respect the voice of patients and stakeholders by incorporating extensive input  
56 in design, implementation, and dissemination.

57 **I.C. Rationale behind the current research and potential benefits to patients and/or society.** Our study is one of  
58 the first to test whether changes in patient activation and self-management together with a provider coaching  
59 program to increase provider receptivity improves SDM and patient's perception of behavioral health care quality.  
60 Although past research suggests that racial/ethnic minority patients take a more passive role in treatment and are less  
61 likely to discuss information with a health care provider, the DECIDE-PA study demonstrated that racial/ethnic  
62 minority patients' level of activation and self-management can increase. However, the main tenet of SDM is that  
63 two active participants, the patient and the provider, are needed.<sup>25</sup>

64 This study also fills a gap for scientifically rigorous research in clinics that ethnic/racial populations depend on to  
65 receive mental health care services.<sup>26</sup> Research shows that minority patients do not have equal access to high quality  
66 care.<sup>27,28</sup> Administrators and providers are eager to implement interventions but first need strong evidence of  
67 improved quality or outcomes in resource-constrained safety net environments.<sup>29</sup> The collaborative engagement of  
68 patients, clinicians, and administrators helps ensure that DECIDE PA+PC is relevant and meets their needs. Further,  
69 the study was designed to triangulate data from multiple perspectives (i.e., patient, clinician, and independent  
70 observer) to allow for better measurement of SDM and other outcomes.

## 71 STUDY AIMS AND PROCEDURES

72 *We include below the study aims and procedures that reflect our completed protocol.*

### 73 II. Specific Aims

74 **II.A. Specific Aims:** Aim 1: Test the effectiveness of the DECIDE PA+PC intervention and the marginal benefit  
75 of DECIDE-PA or PC compared to usual care in improving shared decision making and patient-perceived  
76 quality of behavioral health care.

77 Aim 2: Test whether patient-centered communication and therapeutic alliance mediate the effect of the  
78 DECIDE PA+PC intervention on shared-decision making.

79 Aim 3: Explore whether ethnic/racial or language matching moderates the relationship between the effect of the  
80 DECIDE PA+PC intervention on shared decision making, quality of behavioral health care, patient-centered  
81 communication and therapeutic alliance.

82

### 83 III. Subject Selection

84 **III.A.1. Provider inclusion criteria:** Provider participants  
85 in this study consisted of regular paid staff members that  
86 provide behavioral health services (i.e., psychotherapy  
87 and/or medication) to adult outpatients at each of the  
88 participating study clinics. No other criteria were required.  
89 Across all study sites, approximately 80 providers were  
90 ultimately targeted for recruitment to participate in the  
91 study. The final number of participating providers was 79.  
92 At each site (a "site" may consist of multiple clinics within  
93 one hospital) approximately 4 -10 providers took part in the  
94 intervention trial.

95

96 **III.A.2. Patient inclusion criteria:** Enrollment was limited  
97 to patients ages 18-80, non-Latino White or Latino, Black,

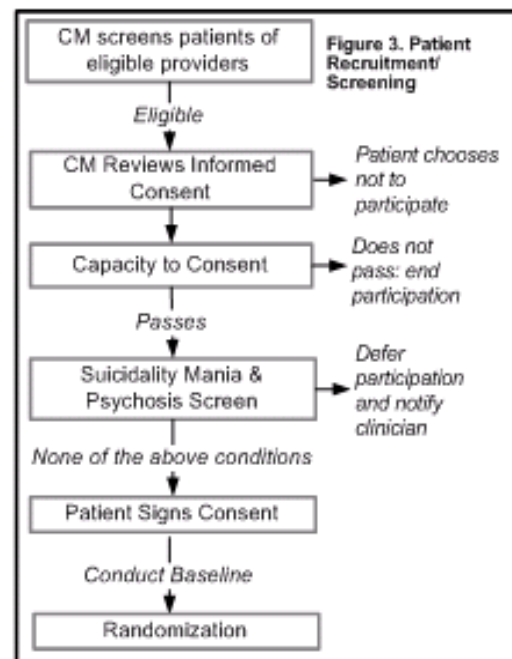

98 or Asian, who were receiving mental health treatment at one of the collaborating clinics, from a participating  
99 provider. Non-English speaking patients were included in the study (i.e., patients who speak Spanish or Mandarin).

100 Across all study sites, 360 patients were targeted to be randomized into the control and intervention arms of the  
101 study, to achieve the target sample size of approximately 300 given expected attrition of 20%. We finalized the  
102 study sample with 312 patients. We refer to these patients as RCT patients. We anticipated enrolling approximately  
103 48-72 patients at each site, half of which would go into the control arm and the other half into the intervention arm  
104 of the study. Additionally, we planned to recruit approximately 124 patients to consent to having one clinical session  
105 audio recorded with their respective consented provider, to use to help train providers enrolled in the intervention  
106 arm of the study. These patients were not randomized to the control or intervention arms. We refer to these patients  
107 as NRCT. We finalized the study sample with 101 NRCT patients.

108 **III.A.3. Patient exclusion criteria:** Patients were excluded for the following: positive screen to a diagnosis of  
109 Bipolar Disorder or taking medication for Bipolar Disorder (i.e. Lithium), diagnosis of Schizophrenia; endorsed  
110 active suicidal ideation in the last 30 days or pending hospitalization; participation in previous DECIDE trials,  
111 failure to pass the mini-cognition assessment for participants 65 years of age or older; or indication by the provider  
112 that a patient was too sick to participate in the study. Patients younger than 18 years of age or older than 80 years of  
113 age were also excluded. Suicidal patients or patients who were pending hospitalization in the community had the  
114 option to be rescreened one month following their initial screening if these previous conditions were resolved.  
115 Suicidal patients were referred for immediate help following a study emergency protocol determined in  
116 collaboration with clinic staff.

Figure 1:  
Patient  
Recruitment/  
Screening

117 **III.A.4. Focus group inclusion criteria:** Patients and providers who completed their participation in the study were  
118 eligible to participate in focus groups following the clinical trial. Patients and providers who did not participate in  
119 the study were also invited to participate, as described further below. A total of 30 patients and 19 providers  
120 participated in our focus groups (49 total).

121 **III.B. Source of Subjects and Recruitment Methods:** We recruited at selected community health clinics, both  
122 those where we had established collaborations, as well as new partnerships that we forged. The clinics were chosen  
123 based on criteria including patient and provider volume, demographics in terms of a high percentage of Latino,  
124 Black, Asian and non-Latino White patients, previous collaborations, and skilled Site Leaders/Co-Investigators. We  
125 recruited providers who are regular staff at each clinic. Only patients of these providers were eligible for  
126 randomization.

127 A series of presentations and meetings were held to introduce staff at each of the clinics to the study. We collected  
128 informed consent forms from those providers that were interested in participating (as was done in DECIDE-PA). To  
129 screen patients, we enlisted the help of providers as well as administrative assistants (AA) at each of the clinics, who  
130 had access to provider caseloads, schedules, and patient demographics. To coordinate recruitment, we asked AAs to  
131 select those who patients who met basic eligibility criteria: between 18-80 years old, non-Latino White or Latino,  
132 Black, or Asian, and not at risk for self-harm if known to the clinic. At selected clinics we had access to EPIC  
133 electronic records to help with this process. Patients were assured that accepting or declining to participate would  
134 not affect their standard clinical care.

## 135 IV. Subject Enrollment

136 **IV. A.1. Methods of enrollment, including procedures for patient registration and/or randomization:** The  
137 DECIDE PA+PC intervention involved a randomized controlled trial of patients within providers participating in the  
138 proposed study. The original target was 8-10 providers (always in pairs at participating clinics, half going to the  
139 intervention and half to the control condition) every 6 months. Approximately 4-8 patients from each of these  
140 providers participated in the study design. In some clinics this number varied depending on patient flow.

141 At each clinic, participating providers completed a baseline interview, the RA1, after which they were randomized  
142 to the control or intervention (DECIDE-PC) arms. All providers audio recorded one clinical session with 1-2  
143 separate patients (called NRCT patients) in order to help train providers enrolled in the intervention arm of the  
144 study. Providers in the control arm continued administering usual care. Providers randomized to the intervention arm  
145 participated in a 1.5 day training led by coaches as well as 1-6 follow up coaching calls throughout the study period.

146 Following provider training, consented patients were recruited and randomly assigned to DECIDE-PA or usual care.  
147 We implemented a randomized clinical trial, whereby patients were randomized to the DECIDE-PA intervention or  
148 usual care within each of the clinics and with each of the randomized consenting providers receiving DECIDE-PC or  
149 not. Patients assigned to the intervention received 1-3 training sessions delivered by a Care Manager (CM) over a  
150 period of 2-6 months; patients in the control arm received treatment as usual. Patients in the intervention arm elected  
151 to complete their trainings either in person (at the participating clinic or in their homes), or over the phone. Providers  
152 and participants in the control arm of the study were eligible to receive the DECIDE-PC and DECIDE-PA  
153 interventions respectively, once their participation in the study was complete.

154 **Assessment of outcomes:** Outcomes were measured by research assistants (RAs) who were not involved in the  
155 provider-or patient-level trainings. Patients were assessed at 3 time points during the study, with the RA1 or baseline  
156 assessment completed at the time of their enrollment in the study and before treatment exposure. The second  
157 assessment, the RA2, occurred 1 to 2 months following the first, and took place within 24 hours of the  
158 patient/provider clinical session recording. This was planned to be done after both the provider and patient had  
159 treatment exposure. However, in some cases patients in the intervention were given RA2, without having treatment  
160 exposure. Patients who lost their health insurance prior to the clinical session being recorded, but who wished to  
161 remain in the study, had the opportunity to have one clinical session with their provider paid for by the study. The  
162 third and final assessment, the RA3, occurred 3 to 6 months after the baseline assessment and signaled the  
163 conclusion of the patient's participation in the study. Patients could elect to complete these assessments either in  
164 person (at the participating clinic or in their homes) or over the phone. Providers completed an online assessment,  
165 the RA2, ideally within 24 hours of recording a clinical session with their participating patients. Providers  
166 randomized to the intervention participated in follow-up calls with coaches, one call for every session recorded, as  
167 well as a final wrap-up call. Once all calls were completed, providers completed the final assessment of the study.

168 We summarize here the three different methods of data collection:

169 1) *Patient assessments* were collected in face-to-face interviews or by phone at baseline (RA1), 1-2 months  
170 (RA2), and 3 to 6 months (RA3). Follow up interviews were conducted with patients even if the patient were no  
171 longer receiving care at the clinic or no longer was seeing their study provider.

172 2) *Provider assessments* were collected in face-to-face interviews or by phone. Providers were asked about their  
173 general interactions with patients at baseline and post-intervention, and specifically about their clinical encounter  
174 after the clinical visit (RA2).

175 3) *Coded audio recordings of the clinical visit* (RA2 only). We obtained audio recordings of each clinical visit  
176 for the participating patients for both intervention and control providers. These recordings were coded by blinded  
177 research staff for SDM, patient-centered communication, therapeutic alliance, provider receptivity, and global  
178 interaction rating.

179 **Difficult to reach patients:** There were often difficult to reach patients. As the study progressed, we ramped up  
180 follow up procedures to assist with patient retention in the study. We offered more flexibility to the patients in terms  
181 of when and where the interviews could be completed. We completed interviews after hours, during the weekends,  
182 and at times in the patient's home. Our call protocol was increased to 6 daily attempts: 2 in the morning, 2 in the  
183 afternoon, and 2 in the evenings. In some cases patients' phones were disconnected, their voicemails were full, or  
184 we had outdated information in our records. We worked with clinic administrative staff to obtain updated contact  
185 information. For patients who we still could not reach, we sent them a letter informing them that we would visit their  
186 homes to check on their well-being and complete the assessments. The research assistants were all trained in safety  
187 procedures for home visits. Permission to visit patients in their homes was included in the consent forms.

188 **Focus groups:** Towards the end of the study period, two community forums (breakfast meetings) and 7 focus  
189 groups were held. These forums and groups were used not only to disseminate preliminary results from the study,  
190 but also to enable us to receive feedback and insight from participants in order to inform future research. Patient  
191 focus groups took place in English, Spanish, and Mandarin and were audio recorded for quality control and  
192 transcription purposes.

193

194 **IV. A.2. Recruitment and Consent Procedures**

195 **Providers:** Research staff worked together with Site Leaders at each participating clinic to recruit providers who  
196 were regular staff members of the clinic. Dr. Margarita Alegria and the research team then conducted a series of  
197 presentations and meetings to introduce the study to providers and clinic staff. Following the presentations, the  
198 research staff visited clinics to answer any additional questions and to administer informed consent with providers  
199 who expressed interest in participating. Provider Informed Consent forms were explained during the individual and  
200 group meetings with providers, including information about the potential risks and benefits of enrollment, the  
201 collection of provider data, the need for audio recordings of patient visits, the voluntary nature of their participation,  
202 and the option of withdrawal at any point during the course of the study.  
203

204 **Patients:** In terms of patient enrollment, study Research Assistants (RAs) collaborated with the participating  
205 administrative staff at each clinic in order to obtain the clinical schedule for enrolled providers. The clinical  
206 schedules were then used to determine which patients were eligible to approach for participating providers. Patients  
207 were approached if they fit the age requirement (age confirmed by administrative staff) and if the patient did not  
208 display severe levels of cognitive impairment (judged by the RA or as determined by provider in some rare cases  
209 [n=9]). The RAs approached patients that arrived at the clinic well in advance (at least 15 minutes) of their  
210 appointment, or as patients were completing their appointments. We also posted flyers in Spanish, English, and  
211 Mandarin at participating clinics to increase our equitable recruitment at all clinics. At certain clinics, RAs were  
212 granted limited access to electronic scheduling systems (e.g., EPIC), to determine provider schedules or enrolled  
213 patients' next appointments. Patient eligibility and consent to participate was then determined during an in person  
214 screening visit. All participation in the study was voluntary. Patients were assured that accepting or declining to  
215 participate would not affect their clinical care, and their participation in the study was completely voluntary. RAs  
216 noted patients who declined participation with a study ID so as not to approach them in the future and for tracking  
217 purposes.  
218

219 Patients were given as much time as they needed to think about participating. Patients who might have been eligible  
220 for the study, but who did not have time to speak with an RA in the clinic originally signed a "pre-consent" form  
221 giving permission to the study staff to contact them by email or phone. The RA contacted them with more  
222 information about the study and to set up a time to administer the screening. Once the research team moved to  
223 Massachusetts General Hospital, the hospital's IRB no longer required a "pre-consent" form. In lieu of the "pre-  
224 consent" form, RAs provided interested patients a study information sheet that included the research team's contact  
225 information. RAs then collected patient information during informed consent and screening, after the patient had  
226 contacted the research team.

227 RAs took patients to a separate, private room in order to review the informed consent form and perform the screener  
228 for eligibility. Patients over the age of 65 were further screened for cognitive impairment using a mini-cognition  
229 assessment to ensure they were capable of participation. Patients in substance abuse clinics only were asked to  
230 demonstrate capacity-to-consent by answering 8 out of 10 questions about the consent form correctly in order to  
231 participate in the study, given concern about intoxication or use of substances prior to the consent process. Those  
232 who could not complete the capacity to consent measure were considered ineligible, even if their screener indicated  
233 eligibility. Patients were informed that the research team would make every effort to ensure that the information  
234 they shared during the course of the trainings and assessments was kept confidential and only reported in aggregate  
235 form.

236 English and non-English speaking patients were also included in the study (i.e., patients who spoke Spanish or  
237 Mandarin). The study was conducted fully in three languages: English, Spanish, or Mandarin Chinese). To assist  
238 with their equitable recruitment, RAs in charge of recruitment were fluent in at least two of the three languages to  
239 assist and be able to fully consent non-English speaking patients. Consent forms were professionally translated and  
240 available in all three languages.  
241

242 **Focus Groups:** Patients and providers who previously participated in the study were contacted by an RA to gauge  
243 interest in participating in a focus group. Focus Group Informed Consent was obtained verbally, since no PHI was  
244 collected during the course of the groups.  
245

246 **Provider final qualitative data:** As we finalized the study, we examined potential challenges and barriers to  
247 implement our intervention in real world practice. We collected qualitative data from a portion of the providers (n=  
248 41) on clinical and organizational challenges and facilitators to implementing the DECIDE-PC provider intervention

249 in a real-world setting. We used a survey questionnaire with 6 questions. Participants answered the survey on  
250 RedCap. The entire survey took less than 15 minutes of their time. Participants received a \$50 gift card upon  
251 completion of the survey.

#### 252 **IV.A.3. Remuneration**

254 Consented patients who were screened for the study, but who did not meet eligibility requirements based on the  
255 screener, were not included in the study, but received a \$10 gift card.

256 The 1-2 NRCT patients per provider, who consented to having their clinical session with their provider audio  
257 recorded, completed a brief baseline assessment, the RAO, (i.e., the patient is not randomized to the control arm or  
258 intervention arm of the study) and received a \$20 gift card.

259 **Patient participants in the intervention arm** of the study were given a total of \$120 worth of gift cards for their  
260 participation. This includes compensation for 3 interviews (\$25 for each of the first two assessments and \$40 for the  
261 final assessment) and 3 training sessions (\$10 per session to help with transportation and child care expenses to  
262 participate in the trainings). At the conclusion of the study, we increased the incentive from \$25 to \$50 for the  
263 clinical recording and the 2<sup>nd</sup> interview, to facilitate patient completion of study protocol.

264 **Patient participants in the control group** received a total compensation of \$90 for the 3 interviews (\$25 for each  
265 of the first two assessments and \$40 for the final assessment). At the conclusion of the study, we increased the  
266 incentive from \$25 to \$50 for the clinical recording and the 2<sup>nd</sup> interview.

267 **Provider participants in the intervention arm** of the study received incentives for the DECIDE-PC behavioral  
268 health provider trainings (\$300 per provider for participating in the training) and received continuing education  
269 credits for their respective disciplines (e.g., social work, psychology, psychiatry). Providers received up to 18.5 total  
270 continuing education credits (11.5 for the training and up to 1 additional credit for each follow-up coaching call and  
271 1 for the wrap up call.) Providers were paid \$50 for each of two research assessments (total \$100), conducted by the  
272 RAs. We also paid \$50 to providers per patient to take part in a self-administered post-appointment assessment  
273 (RA2) that helped them evaluate how they were doing with their patients. Therefore, providers in the intervention  
274 group (i.e., those that received the DECIDE training) received a total of \$700 [(\$300 for provider training) + (\$50  
275 per research assessment \* 2 assessments [baseline (RA1 and RA3)] + (\$50 per patient post-appointment, self-  
276 administered assessment RA2 \* up to 6 patients)] to participate in the study.

277 **Provider participants in the control group** (i.e., did not receive the DECIDE training, but participated in all other  
278 aspects of the study) received a total of \$400 [(\$50 per research interview \* 2 interviews) + (\$50 per patient post-  
279 appointment, self-administered survey \* 6 patients)] to participate in the study.

280 **Patient and Provider participants in the focus groups** received a \$50 gift card for their participation.

#### 281 **V. Interventions**

282  
283 **V.A.1. Provider Intervention:** Provider coaching focuses on augmenting patient-centered communication and  
284 therapeutic alliance as a possible underlying pathway by which SDM can take place. Provider Coaching targets three  
285 areas that were identified in our previous Patient Provider Encounter Study<sup>30-32</sup> as problematic in forming good  
286 provider-patient interactions as well as using recommended coaching on patient-centered communication shown to  
287 be effective in clinical encounters.<sup>33-39</sup> These are: 1) lack of **perspective taking** or the ability to step outside of one's  
288 own experience and accurately identify the emotions and perceptions of others;<sup>40</sup> 2) frequent **attributional errors**  
289 that involve dispositional inferences,<sup>41</sup> where one attributes negative behaviors of out-group members (people of  
290 different ethnicity/race or language) to innate traits whereas negative behavior of in-group members is attributed to  
291 more situational factors as well as inaccurate identification of patient's feelings and emotions; and 3) decreased  
292 **receptivity to patient participation and collaboration in decision making**. In addition, we included three  
293 additional areas reported in the literature: 4) **patient activation**; 5) **patient engagement**; 6) **global impressions** (i.e.  
294 warmth, respect for patient); and 7) **encouraging open communication**.

295 The training consisted of three parts totaling ~20 hours. The first part included 12 hours of a small group  
296 experiential workshop, including two hours of individual feedback on the seven targeted areas of intervention  
297 mentioned above. The second part included 6 hours of individual coaching. A third part consisted of a 1 hour wrap-  
298 up call to summarize the coaching work.

299 **Part 1:** Provider receptivity to SDM was introduced in a group workshop. Providers were given an overview of the  
300 goals and logistics of the trainings, followed by a brief presentation of the research behind patient activation and our  
301 own study findings. We explained how the provider intervention teaches communication skills in listening, eliciting  
302 the patient’s agenda, encouraging question asking, and illness management education. Videos of two contrasting  
303 interviews (responsive and non-responsive providers) were presented and discussed, focusing on *attentiveness* (how  
304 patients’ concerns and understandings are taken seriously by the provider), *facilitation* (encouraging patients to  
305 express concerns in their own words and facilitating self-management and activation) and *collaboration* (supporting  
306 patients as partners in the process of mental health care). Techniques demonstrated included “giving the floor” to the  
307 patient (attentiveness), focusing on the voice of the patient rather than the voice of medicine (facilitation), and  
308 validating the patient as a co-producer/partner of treatment outcomes (collaboration). The training emphasized that  
309 allowing patient-initiated topics signals to patients that they are responsible for their treatment. The non-responsive  
310 interview exemplified non-specific attention markers (e.g., Um hum), narrow medically-focused questions, ignoring  
311 patient distress and confusion, and interrupting the patient. Facilitation was covered by showing how provider  
312 utterances can effectively elicit patients’ accounts and reinforce question asking. Providers role played both types of  
313 providers and reflected on the experience. To increase the effectiveness of the intervention, many of the exercises  
314 during the workshop were based on recordings of two audio taped sessions conducted by the provider prior to the  
315 training (after securing patient consent). These audio recordings were reviewed by coaches with relevant sections  
316 transcribed to provide feedback in the next training session. Reviews of audio-recordings supported the development  
317 of attentiveness, facilitation and collaboration in patient encounters. By specifying features of the verbal interaction  
318 in the transcription that distinguish between provider “successes” and “challenges” in responsive care, the providers  
319 identified how to responsively ask, listen and collaborate. Providers also recognized how patient disclosures lead to  
320 exploration of the conditions and circumstances that contribute to mental health problems, activation, and self-  
321 management.

322 As part of the training workshop, providers received up to two hours of individual coaching to reinforce their  
323 reactions to the idea that their responsiveness to patients can change clinical practice. These coaching sessions were  
324 based on coding of the two recorded sessions from the provider’s actual clinical encounters prior to participation in  
325 the intervention. Feedback was conducted face to face with the coding coach and was based on written structured  
326 feedback that was reviewed with the provider. The goal of the training was to deepen the reflection process and  
327 learning through application of skills acquired in real life case material. The emphasis was on giving the provider  
328 specific feedback based on an analysis of their SDM, their attributional errors (if they incorrectly assume the  
329 patient’s age or education as compared to the actual information for the patient) as well as receptivity of patient’s  
330 activation and self-management. Most of the integration of the trainings was done by providing explicit feedback of  
331 how they could conduct the interview differently to promote patient activation and self-management as well as  
332 SDM. In a small group format utilizing active learning, providers supported each other, discussing the  
333 organizational and clinical barriers that might interfere with institutionalizing attentiveness, facilitation and  
334 collaboration in care. The goal of the training was to provide individual learning and application of the knowledge  
335 acquired in the workshop as well as to promote reflection to raise awareness on the part of providers.

336 **Part 2:** Follow up individual training session (up to a maximum of 6 hours) took place within two to six months of  
337 the training workshop (scheduled at the provider’s convenience and also depending on the time it took to recruit  
338 eligible patients and invite them to be in the study and get an appointment with their provider where we could  
339 audiotape their session). The goal of these calls (phone) was to discuss any remaining questions regarding the  
340 training, using the additional up to 6 audio taped sessions conducted by the provider following the training. Ideally,  
341 each provider had 6 participating patients that were recruited and consented to be in the study (half participating in  
342 the DECIDE PA and half in the usual care condition), but due to a limited patient pool, providers typically had  
343 fewer than 6 participating patients. The goal of the follow up sessions was to identify more topics from the training  
344 to review in some detail. The review was meant to give participants more training in areas that were not mastered  
345 during the first two sessions, using examples from the tapes and providing more feedback. Structured individual  
346 feedback was provided for each recorded session covering the topics in the workshop and specifying areas of

347 strength, areas of average functioning and areas in need for improvement. Written feedback was emailed prior to  
348 each call to facilitate discussion and practice of skills taught.

349 **Part 3:** This consisted of a wrap-up session to summarize and conclude the coaching that providers received.

350 **V.A.2. Implementation of Provider Coaching (PC) Intervention.** The PC Intervention began with recruiting  
351 providers at the designated clinics. Both Patient and Provider DECIDE Interventions were reviewed and received  
352 input from our Community Advisory Board (CAB). This allowed for the first phase of participant recruitment and  
353 randomization to occur promptly. Participating providers signed a consent form, agreeing to attend the provider  
354 trainings and to complete a process interview for 6 of their participating patients during the following 6 months of  
355 the project. In addition, a baseline and 6 month follow-up interview were collected. Once the providers had been  
356 trained, the implementation phase of the patient intervention began. Providers could opt out of the coaching  
357 intervention at any time.

358 **V.A.3. Patient Activation Intervention (DECIDE-PA). We conducted three trainings with** behavioral health  
359 patients who were randomized to the intervention. Trainings each lasted 30-45 minutes. *Training 1 (Decisions and*  
360 *Agency)* increased participants' awareness of their role in clinical interactions and encouraged participation and  
361 decision making in care. Participants were given an overview of training goals and logistics, and were taught  
362 question formulation (Brainstorming) and question-asking strategies. Each participant received a Planner  
363 summarizing the intervention sessions. *Training 2 (the Who, How and Why of Decisions)* taught skills for  
364 understanding treatment decisions in terms of the roles, processes, and reasons involved. Care Managers reviewed  
365 the practice assignment (i.e. asking questions of providers). Because some patients were critical of their  
366 'performance' while others were successful, this was a time where tailoring and addressing barriers was critical.  
367 Role-playing and practice assignments helped strengthen learning. *Training 3 (Self-Efficacy and Consolidation)* was  
368 a self-efficacy module, in which participants learned different ways to help answer questions about their behavioral  
369 health conditions or treatment options, such as consulting information on evidence-based practices. More time was  
370 spent reinforcing the skills learned and identifying areas in need of review

## 371 VI. Biostatistical Analysis

372 **VI. A. Data and Measures:** *The main outcome was SDM*, as measured by the OPTION, a scale based on the blind  
373 coded audio recording of the clinical visit at RA2, or what we refer to as the blind coder SDM. OPTION is an  
374 observer-rated tool developed from a SDM competencies framework including: problem definition, through  
375 exploration and discussion of alternative choices, explanation of options and risk and engagement in the decision  
376 making process. The OPTION scale measures overall provider involvement in these competencies and provides an  
377 indication of the quality of provider involvement in the SDM process as well as precise areas for improvement.  
378 Following Legare and colleagues' recommendation<sup>42</sup> of the need to triangulate SDM measurement from multiple  
379 perspectives (patient, provider and independent observer) we also use the SDM-9 to assess patient-reported SDM<sup>43</sup> (  
380 which we refer to in the final report as patient's SDM) from the visit and separately the SDM-Q-9 Doc<sup>44</sup> to get the  
381 provider-reported SDM for that same visit (which we refer to as provider's SDM). The OPTION (independent  
382 observer) is an objective measure of SDM, while the SDM-9 and SDM-Q-9 are subjective measures (i.e. the  
383 provider's and patient's perception). Representative items include, "My provider wanted to know exactly how I  
384 want to be involved in making the decision" (patient), "I told my patient that there are different options for treating  
385 his/her condition" (provider). The SDM-9 (patient and provider forms) measures nine constructs (e.g. preferences  
386 for involvement, negotiation) deemed essential to SDM. The nine-items are rated on six point scale from  
387 "completely disagree" to "completely agree." A summation of all items results in a raw score of between 0 and 45,  
388 transformed by multiplication to result in a range from 0 to 100, where 0 indicates the lowest level and 100 the  
389 highest. The analysis of this primary outcome is the focus at RA3.

390 *Our secondary outcome is patient's perception of quality of care*, measured with the Perceptions of Care (POC)<sup>45</sup>  
391 survey; a patient self-report questionnaire assessing perception of care and interpersonal experience with a  
392 provider(s) during an outpatient visit. An 18-item rating system, it measures continuity of care, provider availability,  
393 communication, access to provider, and global evaluation of care. It has been utilized to provide precise and detailed  
394 feedback about a patient's experience in care. We have adapted the scale and response format by using a 4-item  
395 Likert-type scale from "never" to "always" for each of 10-items. Total scores are scaled from 0 to 100, with higher  
396 scores representing better patient evaluation of care. Representative items include, "Does the provider give you  
397 reassurance and support?"  
398



399  
 400  
 401  
 402  
 403

All of the variables and measures collected are listed in Table 1. This includes variables for both patients and providers and at which point in time they were collected.

**Table 1: Description of Outcome Measures, Mediators, and Control Variables**

| Type of Measure                                                                      | Measure Description                                                                                                                                                                                                                                                                          | Administration (Baseline (T1), Clinical Visit (T2), Post (T3)) |           |           | Measure Description                                                                                                                                                                                                                                                                          | Administration (Baseline (T1), Clinical Visit (T2), Post (T3)) |    |           |           |           |
|--------------------------------------------------------------------------------------|----------------------------------------------------------------------------------------------------------------------------------------------------------------------------------------------------------------------------------------------------------------------------------------------|----------------------------------------------------------------|-----------|-----------|----------------------------------------------------------------------------------------------------------------------------------------------------------------------------------------------------------------------------------------------------------------------------------------------|----------------------------------------------------------------|----|-----------|-----------|-----------|
|                                                                                      |                                                                                                                                                                                                                                                                                              | T1                                                             | T2        | T3        |                                                                                                                                                                                                                                                                                              | T1                                                             | T2 | T3        |           |           |
| <b>Patient Assessment</b>                                                            |                                                                                                                                                                                                                                                                                              | <b>T1</b>                                                      | <b>T2</b> | <b>T3</b> | <b>Provider Assessment</b>                                                                                                                                                                                                                                                                   |                                                                |    | <b>T1</b> | <b>T2</b> | <b>T3</b> |
| <b>Primary Outcome Variables</b>                                                     |                                                                                                                                                                                                                                                                                              |                                                                |           |           |                                                                                                                                                                                                                                                                                              |                                                                |    |           |           |           |
| Self-perceived Shared Decision Making (SDM) Questionnaire: SDM-Q-9 <sup>43, 44</sup> | SDM-Q Patient version: 9-item scale rates patient perception of collaboration with provider.                                                                                                                                                                                                 | X                                                              | X         | X         | SDM-Q Clinician Version: 9-item measure of perceived SDM; $\alpha = .88$                                                                                                                                                                                                                     | X                                                              | X  | X         |           |           |
| Shared Decision Making Coded from Visit: Shared Decision Making OPTION               | Observer-rated tool of patient involvement developed from a framework of SDM competencies.                                                                                                                                                                                                   |                                                                | X         |           | Measures quality of provider involvement.                                                                                                                                                                                                                                                    |                                                                | X  |           |           |           |
| Shared Decision Making (internal measure)                                            | An additional 10-item measure, developed internally, will also be used to assess shared decision making. This measure is more specific to the mental health context and addresses aspects of shared decision making that are targeted by both the patient and provider DECIDE interventions. |                                                                | X         |           | An additional 10-item measure, developed internally, will also be used to assess shared decision making. This measure is more specific to the mental health context and addresses aspects of shared decision making that are targeted by both the patient and provider DECIDE interventions. |                                                                | X  |           |           |           |
| <b>Secondary Outcome Variable</b>                                                    |                                                                                                                                                                                                                                                                                              |                                                                |           |           |                                                                                                                                                                                                                                                                                              |                                                                |    |           |           |           |
| Perceptions of Care Survey <sup>45</sup>                                             | 18-item scale, focused on patients' perception of quality of care.                                                                                                                                                                                                                           | X                                                              | X         | X         |                                                                                                                                                                                                                                                                                              |                                                                |    |           |           |           |
| <b>Mediators of the Intervention Effect on SDM</b>                                   |                                                                                                                                                                                                                                                                                              |                                                                |           |           |                                                                                                                                                                                                                                                                                              |                                                                |    |           |           |           |
| Therapeutic Alliance                                                                 | Therapeutic alliance goals, tasks, and bond. Internal consistency ( $\alpha = .98$ ).                                                                                                                                                                                                        | X                                                              | X         | X         | Provider assessment of WAI. 12-item version.                                                                                                                                                                                                                                                 | X                                                              | X  | X         |           |           |
| Patient-Provider Communication: Sub-scale of Kim Alliance Scale                      | Sub-scale of KAS (11 items) measures patient-provider communication. Validity and                                                                                                                                                                                                            | X                                                              | X         | X         | Provider perception of patient provider communication adapted                                                                                                                                                                                                                                | X                                                              | X  | X         |           |           |

|                                                                                                          |                                                                                                                                                                                 |           |           |           |                                                                         |           |           |           |
|----------------------------------------------------------------------------------------------------------|---------------------------------------------------------------------------------------------------------------------------------------------------------------------------------|-----------|-----------|-----------|-------------------------------------------------------------------------|-----------|-----------|-----------|
| (KAS) <sup>46</sup>                                                                                      | reliability ( $\alpha=0.87$ ).                                                                                                                                                  |           |           |           | from KAS.                                                               |           |           |           |
| <b>Mediators of the Intervention Effect on SDM Operating through the DECIDE-PA Patient Intervention</b>  |                                                                                                                                                                                 |           |           |           |                                                                         |           |           |           |
| Patient Activation Scale <sup>47</sup>                                                                   | 9 item scale. Good internal consistency: ( $\alpha=0.82$ Spanish and $\alpha=0.75$ English).                                                                                    | X         | X         | X         | Provider perception of patient's activation.                            |           | X         |           |
| Patient's Perception of Self-Management, Decision Making                                                 | Short-form of PEPPi measures patients' perceived efficacy and self-management ( $\alpha=0.91$ ; 0.85 in Spanish).                                                               | X         | X         | X         | Provider perception of patient's self-management and decision making.   |           | X         |           |
| Patient's Perception of Provider's Demographic Factors                                                   | Accuracy of patient's perception of their provider's ethnicity, education, SES, and social position.                                                                            | X         |           |           | Provider's perception of patient's ethnicity, education, SES, position. |           | X         |           |
| <b>Mediators of the Intervention Effect on SDM Operating through the DECIDE-PC Provider Intervention</b> |                                                                                                                                                                                 |           |           |           |                                                                         |           |           |           |
|                                                                                                          | <b>Provider Assessment</b>                                                                                                                                                      |           |           |           |                                                                         | <b>T1</b> | <b>T2</b> | <b>T3</b> |
| Patient-Centered Behavior Coding <sup>48</sup>                                                           | Measure of provider's facilitating and inhibiting behaviors.                                                                                                                    |           |           |           |                                                                         |           | X         |           |
| Active Listening Observation Scale <sup>49</sup>                                                         | Captures the provider's effort to unravel patient's reason for the visit.                                                                                                       |           |           |           |                                                                         |           | X         |           |
| Global Rating <sup>50, 51</sup>                                                                          | Three one-minute excerpts rated for tension, interest, warmth, engagement, linking (of the other), and emotional openness.                                                      |           |           |           |                                                                         |           | X         |           |
| Four Habits Coding Scheme <sup>52</sup>                                                                  | Items measured on 5-point scale: Habit 1 (Invest in the Beginning); Habit 2 (Elicit Patient's Perspective); Habit 3 (Demonstrate Empathy); Habit 4 (Invest in the End).         |           |           |           |                                                                         |           | X         |           |
| <b>Race/Ethnicity and Language Concordance</b>                                                           |                                                                                                                                                                                 |           |           |           |                                                                         |           |           |           |
|                                                                                                          | <b>Patient Assessment</b>                                                                                                                                                       | <b>T1</b> | <b>T2</b> | <b>T3</b> | <b>Provider Assessment</b>                                              | <b>T1</b> | <b>T2</b> | <b>T3</b> |
| Race/Ethnicity                                                                                           | Census definition of Race/Ethnicity for patient                                                                                                                                 | X         |           |           | Census definition - provider                                            | X         |           |           |
| Language Proficiency                                                                                     | Evaluated by single item                                                                                                                                                        | X         |           |           | Evaluated by 1 item                                                     | X         |           |           |
| <b>Mental Health Status / Health Status Variables – For Adjustment in Regression Models</b>              |                                                                                                                                                                                 |           |           |           |                                                                         |           |           |           |
| Clinical Global Impression – Improvement (CGI-I)                                                         | 7-point scale rates patient's change in symptoms relative to baseline state.                                                                                                    | X         | X         | X         | Perception of patient's CGI-I.                                          |           | X         |           |
|                                                                                                          | <b>Patient Assessment</b>                                                                                                                                                       |           |           |           |                                                                         | <b>T1</b> | <b>T2</b> | <b>T3</b> |
| Depression: Patient Health Questionnaire (PHQ-9) <sup>53</sup>                                           | PHQ-9: 9 criteria for depression screening; Health professional Dx ( $k = 0.74$ ; overall accuracy, 88%; sensitivity, 87%; specificity, 88%).                                   | X         |           |           |                                                                         | X         |           | X         |
| Generalized Anxiety Disorder: (GAD-7) <sup>54, 55</sup>                                                  | GAD-7: 7-item measure; good values of sensitivity (86.8%) and specificity (93.4%); AUC statistically significant [AUC = 0.957-0.985; $p < 0.001$ ].                             | X         |           |           |                                                                         | X         |           | X         |
| Trauma: Primary Care-Post Traumatic Stress Disorder (PC-PTSD) <sup>56, 57</sup>                          | PC-PTSD screen: Brief 4-item screener for PTSD with good sensitivity (0.77), specificity (0.85), and efficiency of 0.85.                                                        | X         |           |           |                                                                         | X         |           | X         |
| Physical Comorbidity: SF-12 <sup>58</sup> / WHODAS 2 <sup>59</sup>                                       | SF-12 <sup>58</sup> and WHODAS 2 <sup>59</sup> : Functional Health Status (SF-12): physical health =.91 and emotional health=.92. WHODAS 2, global measure of disability; 0.89. | X         |           |           |                                                                         | X         |           | X         |

|                                                       |                                                                                                                                                                                                                                 |           |           |           |                                                                                                                                                     |           |           |           |
|-------------------------------------------------------|---------------------------------------------------------------------------------------------------------------------------------------------------------------------------------------------------------------------------------|-----------|-----------|-----------|-----------------------------------------------------------------------------------------------------------------------------------------------------|-----------|-----------|-----------|
| Chronic Conditions                                    | From NLAAS                                                                                                                                                                                                                      | X         |           |           | X                                                                                                                                                   |           |           |           |
| Alcohol and Drugs:<br>CAGE – AID <sup>60</sup>        | CAGE-AID screener exhibited sensitivity (0.79) / specificity (0.77) for 1+ ‘yes’ responses. sensitivity (0.70) and specificity (0.85) for 2+ ‘yes’ responses.                                                                   | X         |           |           | X                                                                                                                                                   |           |           |           |
| <b>Other Variables</b>                                |                                                                                                                                                                                                                                 |           |           |           |                                                                                                                                                     |           |           |           |
|                                                       | <b>Patient Assessment</b>                                                                                                                                                                                                       | <b>T1</b> | <b>T2</b> | <b>T3</b> | <b>Provider Assessment</b>                                                                                                                          | <b>T1</b> | <b>T2</b> | <b>T3</b> |
| Patient’s Demographics and Socio-contextual Factors   | Includes gender, education, employment, income insurance, perceived social status, literacy, language, preferences in care.                                                                                                     | X         |           |           | Includes gender, education, income, training, perceived social status, language.                                                                    | X         |           |           |
| Patient activation Measure                            | 13-item patient scale, measures activation among individuals with mental health.                                                                                                                                                | X         | X         | X         |                                                                                                                                                     |           |           |           |
| In Vivo Scale                                         | 13-item scale, patient rates to what extent s/he experienced 13 feelings during visit with provider (ex., nervous, relieved, etc.)                                                                                              |           | X         |           | 14-item scale, provider rates to what extent patient seemed to experience 14 feelings during visit. The extra 14th item is “satisfied, overall.”    |           |           |           |
| Questions Related to Decision Making                  | Ten questions related to how the patient and his/her provider communicated with each other and made decisions during their most recent visit.                                                                                   | X         | X         | X         | Provider version includes 10 questions related to how provider and patient communicate with each other and make decisions during most recent visit. |           |           |           |
| Relationship with Patient                             | NA                                                                                                                                                                                                                              |           |           |           | 23 items, questions relate to the typical relationship provider has with patients in general.                                                       |           |           |           |
| Provider Bias                                         | Eight questions related to provider characteristics that may influence dropping out of care.                                                                                                                                    | X         |           | X         | NA                                                                                                                                                  |           |           |           |
| Decision Making-Clarity of Provider                   | 10-item assessment, patient rates perceived communication between him/her and provider. For example, patient assesses how often provider uses clear language, how often provider makes sure s/he understands treatment options. | X         |           |           | NA                                                                                                                                                  |           |           |           |
| Reasons for Termination                               | 10 items, asks patient to rate how important each reason was in deciding to terminate treatment.                                                                                                                                |           | X         | X         |                                                                                                                                                     |           |           |           |
| Perceptions of Provider/ Patient-Provider Interaction | “Perceptions of Provider”; 4-item, patients assesses perceived race/ethnicity, education and socioeconomic status of provider.                                                                                                  | X         | X         | X         | Provider assesses perceived race/ethnicity, education and socioeconomic status of patient.                                                          |           |           |           |
| Language Proficiency                                  | 4 questions that ask patient how well s/he is able to read, write and speak in English. Language preference for interview is asked.                                                                                             | X         |           |           | 4 questions that ask providers how well s/he is able to read, write and speak in English.                                                           |           |           |           |

|                                               |                                                                                                                                                                                                         |   |  |   |                                                                                                                                             |  |  |  |
|-----------------------------------------------|---------------------------------------------------------------------------------------------------------------------------------------------------------------------------------------------------------|---|--|---|---------------------------------------------------------------------------------------------------------------------------------------------|--|--|--|
|                                               | If second language spoken, they are asked about that as well.                                                                                                                                           |   |  |   | Language preference for interview is asked. If second language is spoken, they are asked about that as well.                                |  |  |  |
| Services                                      | 6-item assessment of service use, used to assess the patient's use of mental health services, such as therapy or psychological counseling, reasons for the services use, and frequency of services use. | X |  |   | NA                                                                                                                                          |  |  |  |
| Health Literacy                               | 18-item assessment. Patient sees a card with one word on top and two words on bottom. Patient is asked to read the top word and to indicate which of bottom two words is associated.                    | X |  |   | NA                                                                                                                                          |  |  |  |
| Cultural Training                             | NA                                                                                                                                                                                                      |   |  |   | One item, Provider is asked if s/he has received cultural training before and how much.                                                     |  |  |  |
| Provider's Perception                         | NA                                                                                                                                                                                                      |   |  |   | 5 items, asks provider to rate different statements regarding perceived patient's confidence in addressing concerns during visit.           |  |  |  |
| Barriers to Treatment                         | 15 items, assesses whether low perceived need, attitudinal problems and structural barriers have prevented patient from getting help in the last year.                                                  |   |  | X | NA                                                                                                                                          |  |  |  |
| Questions about Stigma                        | 2 items, asks patient whether s/he has been affected by stereotypes and if s/he has been mistreated due to her/his identity etc.                                                                        |   |  | X | NA                                                                                                                                          |  |  |  |
| Everyday Discrimination                       | 2-items taken from the 9-item Everyday Discrimination Scale. Patient is asked how often s/he is treated with less respect than others and if so, to specify the reason.                                 |   |  | X | NA                                                                                                                                          |  |  |  |
| Preference for Receiving Patient Intervention | 8 questions, asks patient about participation in trainings, to comment on skills they learned and to comment on anything they would want.                                                               |   |  | X | NA                                                                                                                                          |  |  |  |
| Questions about Shared Decision Making        | 2 questions that ask the patient if s/he has heard of the term "Shared Decision Making" before and to elaborate on what s/he thinks the term means.                                                     |   |  | X | 2 questions that ask if provider has heard of the term "Shared Decision Making" before and to elaborate on what s/he thinks the term means. |  |  |  |

405 **VI. B. Study Endpoints.** The study was designed to last 3 years. Data collection concluded in September 2016.

406 **VI.C.1. Statistical Methods: Mental Health Status and Health Status Covariates and Other Potential Control**  
 407 **Variables:** The effect of patient-centered communication has been found to be dependent on patient’s baseline  
 408 mental health status and illness severity.<sup>61</sup> While randomization is likely to provide balance on both unobserved and  
 409 observed covariates, there is the possibility that one or more of the four study groups may be unbalanced on certain  
 410 clinical characteristics. As such, in patient- and provider-interviews, we collected additional information at each  
 411 time period related to mental health status and health status, and we collected demographics at RA1. We compared  
 412 patients’ demographics across the study groups and found that only personal income differs across groups. The  
 413 current preliminary analysis does not include covariates except for baseline outcome measures. However in future  
 414 work, we will run a sensitivity analysis including more covariates.

415 **VI.C.2. Analytic Methods: Overview:** Table 2 depicts four groups that are analyzed: patients randomized to the  
 416 DECIDE-PA intervention or usual care were seen by providers who were randomized to DECIDE-PC or no  
 417 intervention. We describe our analytical approach for each specific aim below. Before formal analyses, we carried  
 418 out thorough descriptive data analyses to assure that data were free of coding and data entry errors, and to describe  
 419 the marginal distributions of the key variables. We also described the missing variable patterns and determined  
 420 whether the patterns varied by design, clinical or demographic features of the participants. To account for missing  
 421 data, we used multiple imputations which created multiple  
 422 datasets with missing values replaced by the generated imputed  
 423 values. Our imputation was done via chained equations which  
 424 generates predictions based on each conditional density of a  
 425 variable given other variables.<sup>62</sup> Aim 1 and 3 were conducted  
 426 using imputed data and the non-imputed original data was used  
 427 for preliminary analysis of Aim 2. We describe the reason for  
 428 choosing imputed vs. non-imputed data in detail below.

| Table 2. Randomization Design |               |             |
|-------------------------------|---------------|-------------|
| Provider Training (PC)        |               |             |
| Patient Training(PA)          | NO            | YES         |
| NO                            | A /Usual Care | B / Only PC |
| YES                           | C / Only PA   | D / PA+PC   |

429 **VI.C.3. Analysis, Specific Aim 1 (The Effect of DECIDE**  
 430 **PA+PC on Shared Decision Making, Patient Activation, Patient’s Perception of Care, Patient Activation):**  
 431 The first aim was to test whether the intervention (DECIDE-PC or DECIDE-PA) had an impact on three outcomes  
 432 at RA2 and RA3: shared decision making, patient activation, and patient’s perception of quality of their care. We  
 433 first estimated a multilevel mixed-effects model that allows for random effects at the provider level. Thus, the  
 434 hierarchical nature of the models accounted for the non-independence of patients seeing the same provider.<sup>63</sup> For  
 435 example, let  $Y_{ij}$  denotes the RA2 blind coder SDM score for the  $j^{\text{th}}$  patient who was seen by the  $i^{\text{th}}$  provider. We  
 436 estimated the model:

437  
 438 (1)  $Y_{ij} = \beta_{0i} + \beta_1(\text{DECIDE-PA})_{ij} + \beta_2(\text{DECIDE-PC})_{ij} + \beta_3(\text{DECIDE-PA+PC})_{ij} + \beta_4 X_{ij} + \epsilon_{ij}$

439 (2) The provider-specific random intercept can be written as:  $\beta_{0i} = \alpha_{00} + \omega^*_{0i}$

440 where DECIDE-PA was assigned effect codes (-.5, +.5) with -.5 being assigned to patients in the control arm  
 441 (Category A and B in Table 3) and +.5 being assigned to patients in the treatment arm (Category C and D in Table  
 442 3). Similarly, DECIDE-PC was effect coded as well where -.5 was assigned to providers in the control groups  
 443 (Category A and C) and +.5 was assigned to providers in the intervention groups (Category B and D). DECIDE-  
 444 PA+PC denotes the interaction term of the DECIDE-PA and DECIDE-PC.  $X_{ij}$  included baseline outcome measures  
 445 to adjust for imbalance despite random assignment. The term  $\omega^*$  denotes provider random effects and  $\epsilon_{ij}$  is the  
 446 individual error term. We ran sensitivity analyses allowing for random effects at the clinic level, but they suggested  
 447 that random effects at clinic level are minimal, i.e., estimated to be close to zero.

448 Estimations of the model in (1) render the main effects of DECIDE-PA and PC intervention interpretable in the  
 449 context of interactions. Effect-coded regressions allow us to estimate how much the intervention changed the  
 450 outcomes across all patients that were affected by the intervention, i.e., the marginal effect of the DECIDE-PA  
 451 intervention ( $\beta_1$ ), and to estimate how much the intervention changed the outcomes across all provides that received  
 452 the intervention, i.e., the marginal effect of the DECIDE-PC intervention( $\beta_2$ ). An interaction term ( $\beta_3$ ) significantly  
 453 different from zero would suggest additional synergy or anti synergy from the combined DECIDE PA+PC treatment  
 454 over and above the patient-level intervention DECIDE-PA. We also run estimations of the model in (1) with the

455 intervention indicators coded as 0 and 1 (instead of -0.5 and 0.5) but we only report the results of the benchmark  
456 regressions as recommended by our consultants.

457 The primary analysis used intent-to-treat principles and assigned all subjects to their randomly determined category,  
458 regardless of whether or not they actually received treatment. For patients who didn't complete RA2 or RA3  
459 assessment, we used imputation to project their RA2 and/or RA3 outcomes and accessed them according to the  
460 initial random assignment. Therefore, the intent-to-treat  
461 analysis used the imputed datasets to fit model in (1).

462 We ran a similar analysis using treatment dosage as the  
463 independent variable, where treatment dosage is defined as  
464 the number of coaching sessions that patients and/or providers  
465 received relative to the intended treatment (up to 3 for  
466 patients and up to 6 for providers). While this analysis no  
467 longer relies on random assignment, it may still serve as  
468 additional confirmation of the results of the intent-to-treat  
469 analysis and also provide us with further estimates of the  
470 magnitude of the effects.

471 As our primary SDM analysis, we assessed the effect of the  
472 intervention on SDM as measured by the blind coder  
473 (OPTION scale), a continuous-valued variable standardized  
474 to a scale between 0 and 100. As a secondary SDM analysis, we  
475 assessed patient- and provider-perceived SDM (SDM-Q-9)  
476 scores at RA2 and RA3 using the same model as in (1),  
477 controlling for the outcomes at RA1. Two separate models  
478 were estimated, one for patient SDM and one for provider  
479 SDM. We also adapted the model as in (1) to measure our  
480 additional primary outcome variables, patient perceived  
481 quality of health care (five continuous variables measured at  
482 RA2 and RA3). Further, we ran the same analyses for our  
483 secondary outcomes of patient activation (assessed by patient  
484 at RA2 and RA3; and by provider only at RA2) as well.

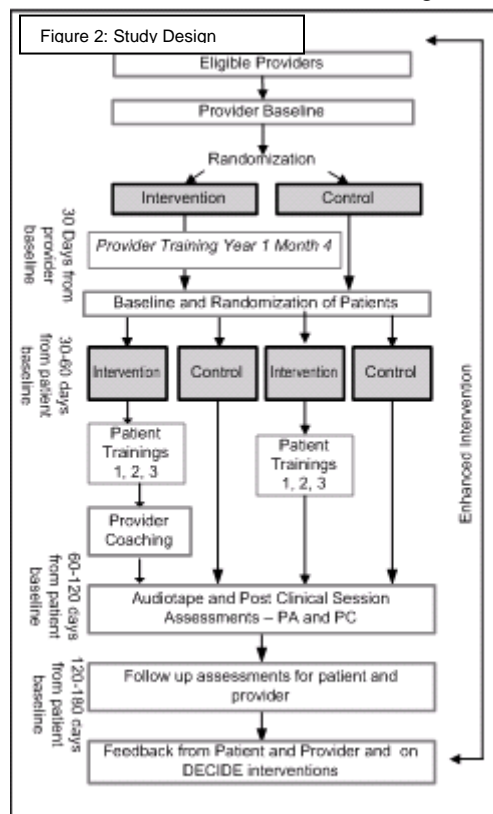

485 **VI. C.4. Analysis, Specific Aim 2 (Understanding the Mechanisms by which Enhanced DECIDE Impacts**  
486 **Shared Decision Making and/or Patient Perceived Quality of Care):** Aim 2 assessed the mediators for the  
487 intervention effects identified in Aim 1. To address not only whether an intervention works but also how it works,  
488 we examine as potential mediators: 1) patient-centered communication (KAS) using both audio recordings and  
489 patient interview data; 2) therapeutic alliance (WAI) (i.e. the degree to which the patient and provider were  
490 “engaged in collaborative, purposive work”);<sup>64</sup> and 3) DECIDE-PA outcomes, i.e., patient activation (PAS) and self-  
491 engagement; perceived efficacy in patient-physician interactions (PEPPI).

492 **VI.C.5. Mediation Analysis:** The mediation analysis plan built on the analysis described for Aim 1 with the  
493 addition of the mediator of interest as a key independent variable. We assessed the impact of the DECIDE-PA and  
494 PC intervention on the hypothesized mediators, and then estimated the direct effect of the intervention after  
495 adjusting for the mediators. These two analyses allowed the indirect path to be estimated and tested using bootstrap  
496 methods or the Sobel test.<sup>65, 66</sup> Our bootstrap methods allow for clustering at the provider level and the clinic level.  
497 We implemented two different types of models: either a so-called 1-1-1 multi-level mediation model, in which the  
498 dependent variable, the independent variable, and the mediator are all at the patient level (level 1); and a 2-1-1  
499 multi-level mediation model in which the independent variable is at the provider level (level 2). We used the non-  
500 imputed data for the preliminary analysis of Aim 2 to circumvent computational constraints imposed by the  
501 compound simulation of bootstrap samples and imputed samples. Moreover, we used a preliminary analysis of the A-  
502 path, i.e., the relationship between the intervention and the mediator, to screen possible mediators. In other words,  
503 only mediators affected by interventions can mediate intervention effects, thus, this analysis helps us to narrow the  
504 set of potential mediators. Finally, we tested for mediation effect only for candidates suggested by A-path analysis  
505 on the intervention effect identified in Aim 1.

506 In a causal mediation framework, the identification of mediators is predicated on an unambiguous ordering of the  
507 treatment, mediator and outcome variables.<sup>67</sup> Having three time periods allowed for an appropriate ordering for the  
508 patient- and provider-perceived SDM-Q-9 measure (i.e., randomization→RA2 communication→ RA3 perceived  
509 SDM). We used assessments of the mediator variables at either RA2 or RA3, depending on the timing of the  
510 assessment of the outcome variable. If the outcome variable was assessed at RA 2, we only use concurrent mediator  
511 variables, i.e., those assessed at RA 2. If the outcome variable was instead assessed at RA 3, we use both concurrent  
512 mediators, i.e., those assessed at RA3, and past mediators, i.e., those assessed at RA 2.

513 We recognize the potential bias of concurrent measurement of the mediator and outcome. A possible prospective  
514 analysis would minimize this bias using adjustment methods proposed by Shrout et al.<sup>68</sup> that account for the  
515 information already available in the *baseline* association between the mediator (i.e., communication) and outcome  
516 (perceived SDM). Considering the baseline mediator (measured at RA1) to be an instrumental variable that has an  
517 impact on SDM only through its connection with the RA2 mediator, we could identify a residual correlation  
518 between the mediator and the outcome variable. Furthermore, we could incorporate the association between the  
519 DECIDE intervention and the mechanisms of interest (communication, therapeutic alliance, perceived self-efficacy  
520 in patient-provider interactions, etc.) as well as the association between the mechanism and the outcomes,  
521 conditional on other covariates. This test of mediation improves upon tests typically conducted<sup>69</sup> in that it uses  
522 models with a full set of covariates, so models are not prone to omitted variable bias.<sup>70</sup>

523 **VI.C.6. Analyses, Specific Aim 3 (Understanding the Moderating Effects of Racial/Ethnic and Linguistic**  
524 **Discordance on the Impact of DECIDE on Shared Decision Making and/or Patient Perceived Quality of**  
525 **Care):** In Aim 3, we explored whether patient/provider racial/ethnic or linguistic discordance moderated the effect  
526 of the DECIDE PA and/or PC intervention. We hypothesized that the intervention effect would be greater among  
527 discordant dyads because there would be more potential to break down communication and decision-making  
528 barriers. Built upon the model described in Aim 1, regression models of Aim 3 included the main effects of patient  
529 and provider racial/ethnic groups (and in separate analyses, language groups) and additional interaction terms:  
530 (Discordant × DECIDE-PA), (Discordant × DECIDE-PC), (Discordant × DECIDE-PA × DECIDE-PC). The  
531 DECIDE PA and PC effect as well as racial/ethnic (and linguistic) discordant indicators were assigned effect codes  
532 (-.5, +.5) to render their main effects interpretable in the context of interactions. We acknowledged major  
533 differences existed across sub-ethnicity, language, and culture within the broad ethnic/racial categories of Latino,  
534 Black, Asian, and non-Latino White. However, the relatively small sample of the DECIDE PA and DECIDE-PC  
535 only allowed us to assess the differences in racial/ethnic groups or language groups rather than more specific  
536 differences.

537 The outcome variables of interest are likely to have a non-linear relationship with the independent variables in  
538 regression models. In the case of non-linear models, interaction coefficients do not represent the marginal effect of  
539 the interaction term.<sup>69</sup> Thus, a possible sensitivity analysis would use a predictive margins approach which applies  
540 the model coefficients from the model to subsequent *counterfactual* populations (i.e., DECIDE-PA with concordant  
541 dyads, DECIDE-PA with discordant dyads, DECIDE-PC with concordant dyads, DECIDE-PC with discordant  
542 dyads, etc.). This technique, named *standardized predictions*<sup>62,70</sup> or *predictive margins*,<sup>71</sup> has been used in previous  
543 health services studies<sup>72-74</sup> and would allow us to compare the effect of the intervention among discordant and  
544 concordant dyads, after standardization of all other variables.

## 545 **VII. Risks and Discomforts**

546 **VII.A.1. Complications of Procedures:** We did not foresee any potential complications to occur with this  
547 intervention.

548 **VII. A.2. Psychosocial (non-medical) Risks to Providers:** There were no expected serious risks to the provider  
549 participants. Minimal risks included potential loss of confidentiality as in all research. We did everything we could  
550 to keep all data we collected confidential. We told provider participants that they may experience some discomfort  
551 from having sessions be audio recorded and from receiving feedback of their audio recordings or from receiving  
552 feedback in emotion recognition exercises. All provider participants were reminded that their participation was  
553 always voluntary and that they could decline continued participation at any time.

554 **VII.A.3. Psychosocial (non-medical) Risks to Patient Participants:** Minimal risks included potential loss of  
555 confidentiality as in all research. The DECIDE intervention has been tested in pilot and multi-site randomized

556 controlled settings with no adverse patient reactions. There was some possibility of patient participant discomfort  
557 when discussing behavioral health problems and treatments in the course of the assessments and trainings. Patient  
558 participants enrolled in the control and intervention arm of the study were asked to disclose information about their  
559 appointments and their interaction with their providers, which may have made them uncomfortable or anxious. The  
560 informed consent form explicitly stated that patient participation was voluntary and that patients could skip or refuse  
561 to answer any items in the assessments. They could stop participation in the study at any point.

562 **VII.A.4. Psychosocial (non-medical) Risks to Community Forum and Focus Group Participants:** Minimal  
563 risks included potential loss of confidentiality as in all research.

## 564 **VIII. Potential Benefits**

565 **VIII.A.1. Potential Benefits for Providers:** The DECIDE PC was designed to help providers improve therapeutic  
566 alliance, patient-provider communication, continuance in care, and satisfaction with services for patients in  
567 concordant and discordant ethnic/racial dyads in order to improve SDM. The DECIDE PC training for providers  
568 consisted of 1.5 days of training which focused on augmenting patient-centered communication and therapeutic  
569 alliance as a possible underlying pathway by which SDM could take place. The training also addressed 1) lack of  
570 perspective taking; 2) frequent attributional errors that providers make; and 3) decreased receptivity to patient  
571 participation and collaboration in decision making. The training included provider coaching totaling 15-20 hours.  
572 Providers learned about their own clinical skills and how to enhance them.

573  
574 **VIII.A.2 Potential Benefits for Patients:** Patients who received the DECIDE-PA may have received a better  
575 quality of care from their mental health providers. Patients may have found it useful to learn new ways to talk with  
576 their health provider about their treatment and that may have improved their overall care. Patients who did not  
577 receive the DECIDE-PA intervention might have benefitted from improved communication or involvement with  
578 their provider, if the provider was part of the DECIDE-PC intervention.

579 **VIII.B. Potential benefits to society:** This study also filled a gap for scientifically rigorous research in clinics that  
580 ethnic/racial populations depend on to receive mental health care services.<sup>75</sup> Research shows that minority patients  
581 do not have equal access to high quality care.<sup>16, 17</sup> Administrators and providers are often eager to implement  
582 interventions but first need strong evidence of improved quality or outcomes in resource-constrained safety net  
583 environments.<sup>18</sup> The collaborative engagement of patients, clinicians, and administrators helped ensure that  
584 DECIDE PA+PC were relevant and met their needs. Further, the study was designed to triangulate data from  
585 multiple perspectives (i.e., patient, clinician, and independent observer) to allow for better measurement of SDM  
586 and other outcomes.

587 Ensuring quality in behavioral health treatments is a critically important goal, especially so for racial/ethnic  
588 minorities given that they receive less behavioral health care<sup>76</sup> and experience more severe consequences from  
589 behavioral health disorders than non-Latino Whites.<sup>77-80</sup> Yet, quality behavioral health care is contingent upon  
590 effective communication and strong therapeutic alliance.<sup>81, 82</sup> The DECIDE intervention had the potential to impact  
591 quality given the centrality of tailoring behavioral provider practices to respond to patient preferences and  
592 concerns<sup>83</sup> and its strong correlation with perceived quality of care.<sup>84</sup> By improving patient-centered communication  
593 and forming a strong therapeutic bond, DECIDE could have helped overcome cultural and social differences across  
594 patients and providers allowing for quality care that reduces disparities in service delivery.<sup>10, 85, 86</sup>

## 595 **IX. Monitoring and Quality Assurance**

596 **IX.A. Data Collection:** To improve the security of data collection, we used Dimagi software's secure server to  
597 collect data via CommCare HQ technology. This was installed in a series of secure tablets through which research  
598 assessments were collected. Dimagi utilizes a HIPAA compliant, secure, encrypted server that allows for host  
599 intrusion and intrusion monitoring system. All technology can only be accessed through secure and password  
600 servers. The CommCareHQ application was installed on tablets and these tablets were made available to research  
601 assistants serving as interviewers on the PCORI study. Our research assistants had already undergone training by  
602 Dimagi. All data transfers to and from the Dimagi server were conducted over industry standard transmission  
603 encryption (HTTPS). All access to the cloud infrastructure was protected behind a firewall and required unique VPN  
604 access permissions. All data was transferred through channels that are monitored by intrusion monitoring system.



605 **IX.B.1. Safety Monitoring: Privacy and Confidentiality:** All documents that include PHI were coded so that  
606 identifiers (i.e., names, addresses, and telephone numbers) were removed and separated from the research  
607 assessments and completed training materials. Research data and notes from participant observations were stored by  
608 research staff in a locked file at each of the study sites and the study data was coded. All materials were securely  
609 transported from study sites to the central DRU site at MGH, where they continued to be kept under lock and key.  
610 Notes and data were uploaded from project laptops to a secure, password protected network maintained by MGH,  
611 for transcription and analysis. In addition to paper forms, assessment data was also collected via Dimagi CommCare  
612 HQ. All audio-recorded in-depth interviews were also uploaded immediately to the same secure, password  
613 protected server maintained at the MGH. No reports were made public using any names or identifying information.  
614 Our coded dataset was stored on a secure central server. Only authorized research staff approved by the site  
615 Institutional Review Boards had access to the data.

616 PHI will be destroyed according to standard protocols, 7 years after the completion of the study. Patients were told  
617 they could withdraw from the study at any point. Information that had been collected up to that point continued to be  
618 used unless specified by the patient.

619 Consent forms were kept at each of the recruitment sites under lock and key as was approved.

### 620 **IX.B.2. Safety Monitoring, Ensuring the Safety of Subjects**

621 **Provider participants:** Provider participation was voluntary and information they provided to study staff  
622 throughout the course of the study remains confidential. Providers were assured that none of their study data was  
623 reported to the Site PI or their supervisor. They could have elected to withdraw from the study at any time.

624 **Patient participants:** Patients were informed in advance that their responses to a suicidality screener may have  
625 required contact with a provider to maintain their safety. This situation was taken very seriously and followed the  
626 emergency protocol developed. Patients were also given contact information for the PI and project coordinator to  
627 whom they could directly report any concerns or questions about their study participation.

628 **Community Forum and Focus Group participants:** There were no serious risks to the participants as a result of  
629 these forums and groups. There was always at least some risk of loss of confidentiality associated with participating  
630 in a community forum or focus group. To help mitigate this risk, we set out as a ground rule of participation that  
631 participants kept confidential the views expressed by their fellow participants and that they did not disclose any  
632 information to anyone outside of the focus group

### 633 **IX.B.3. Monitoring Plans for Quality Assurance**

634 All research team members followed the procedures of confidentiality adhered to by collaborating institutions.  
635 Further, all research staff who worked on this project were required to complete training in data confidentiality and  
636 security issues and sign a confidentiality agreement prior to working with patients or handling identifying  
637 information. The Community Advisory Board (CAB) of this study and all of the Site PIs worked with the DRU's  
638 research team to ensure that the study was monitored from a scientific and ethical standpoint and we held yearly  
639 meetings to assess data collection and management.

640 We provided required research materials, documents and technology, such as audio recorders, to facilitate this work.  
641 The CMs and RAs were granted remote access to the MGH server, to be able to upload recordings, tracking  
642 materials and other information. This information was monitored through quality control checks by the MGH team.  
643 Study staff provided regular supervision and oversight to CMs and RAs. Focus groups were also recorded for  
644 quality assurance and transcription purposes.

### 645 **IX.C. Outcomes Monitoring**

646 The study staff at DRU worked closely with the Site PI, Care Manager (CM) and Research Assistant (RA) at each  
647 participating clinic in the set up and ongoing implementation of the study. We provided required research materials,  
648 documents and technology, such as audio recorders, to facilitate this work. The CM and RA were granted remote  
649 access to the MGH server, to be able to upload recordings, tracking materials and other information. This

650 information was monitored through quality control checks by the MGH team. Study staff provided regular  
651 supervision and oversight to CMs and RAs.

652 Fidelity checks were performed on at least 20% of all DECIDE-PA sessions to ensure interventions were delivered  
653 accurately and fully. These were also rated in a series of markers for each intervention. We worked to make sure  
654 each CM was delivering the intervention at the highest standards. These checks were performed by adherence  
655 checkers who were familiar with the intervention and who had adequate clinical background to provide feedback to  
656 CMs.

657 Quality control checks were performed on 15% of all assessments to ensure that the assessments were conducted  
658 fully and that the data had been entered correctly. Each paper assessment performed was individually checked to  
659 ensure it was entered correctly. Each questionnaire performed using the Dimagi technology was also hand-verified.  
660 Each RA was also required to do weekly checks to ensure all consent forms and patient data was saved securely.

661

662

663

664

665

666

667

668

669

670

671

672

673

674

675

676

677

678

679

680

682 **X. References**

- 683 1. Wang PS, Lane M, Olfson M, Pincus HA, Wells KB, Kessler RC. Twelve-month use of mental health  
684 services in the united states: Results from the national comorbidity survey replication. *Arch Gen*  
685 *Psychiatry*. 2005; 62(6): 629-640.
- 686 2. Aron L, Honberg R, Duckworth K et al. Grading the states 2009: A report on america's health care system  
687 for adults with serious mental illness. Arlington, VA: National Alliance on Mental Illness; 2009.
- 688 3. National Institute of Mental Health. National Institute of Mental Health strategic plan for research.  
689 Bethesda, MD: National Institute of Mental Health; 2008.
- 690 4. New Freedom Commission on Mental Health. Achieving the promise: Transforming mental health care in  
691 america. Final report. Rockville, MD: DHHS Pub. No. SMA- 03-3832; 2003.
- 692 5. Swanson KA, Bastani R, Rubenstein LV, Meredith LS, Ford DE. Effect of mental health care and shared  
693 decision making in patient satisfaction in a community sample of patients with depression. *Med Care Res*  
694 *Rev*2007; 64: 416-430.
- 695 6. U.S. Congressional Budget Office. Selected CBO publications related to health care legislation, 2009-  
696 2010. <http://www.cbo.gov/ftpdocs/120xx/doc12033/12-23-selectedhealthcarepublications.pdf>.
- 697 7. Office of Applied Studies, SAMHSA, & Department of Health and Human Services. Substance abuse and  
698 mental health services administration: Prevalence of substance use among racial & ethnic subgroups in the  
699 U.S. <http://www.oas.samhsa.gov/NHSDA/ethnic/ethn1006.htm>.
- 700 8. Tucker CM, Herman KC, Ferdinand LA et al. Providing patient-centered culturally sensitive health care: A  
701 formative model. *The Counseling Psychologist*. 2007; 35(5): 679-705.
- 702 9. Tucker CM, Herman KC, Pederson TR, Higley BP, Montrichard M, Ivery PD. Cultural sensitivity in  
703 physician-patient relationships: Perspectives of an ethnically diverse sample of low-income primary care  
704 patients. *Med Care*. 2003; 41: 859-870.
- 705 10. Cooper L, Roter D, Johnson R, Ford D, Steinwachs D, Powe N. Patient-centered communication, ratings of  
706 care, and concordance of patient and physician race. *Ann Intern Med*. 2003; 139(11): 907-915.
- 707 11. Cooper AD, Sterling CP, Bacon MP, Bridgeman B. Does action affect perception or memory? *Vision Res*.  
708 62; 2012: 235-240.
- 709 12. Polo AJ, Alegría M, Sirkin JT (2012). Increasing the engagement of latinos in services through community-  
710 derived programs: The right question project—mental health. *Professional Psychology: Research and*  
711 *Practice*, 43(3), 208.
- 712 13. Kirmayer L, Groleau D, Guzder J, Blake C, Jarvis E. Cultural consultation: A model of mental health  
713 service for multicultural societies. *Can J Psychiatry*. 2003; 48(3): 145.
- 714 14. Gilmer TP, Kronick RG. Hard times and health insurance: How many americans will be uninsured by  
715 2010? *Health Aff*. 2009; 28(4): 573-577.
- 716 15. Pippins JR, Alegria M, Haas JS. Association between language proficiency and the quality of primary care  
717 among a national sample of insured latinos. *Med Care*. 2007; 45: 1020-1025.
- 718 16. DuBard CA, Gizlice A. A language spoken and differences in health status, access to care, and receipt of  
719 preventive services among us hispanics. *Am J Public Health*. 2008; 98: 2021-2028. (62)
- 720 17. Bauer AM, Alegria M. Impact of patient language proficiency and interpreter service use on the quality of  
721 psychiatric care: A systematic review. *Psychiatr Serv*. 2010; 61(8): 765-773.
- 722 18. Bauer AM, Chen CN, Alegria M. English language proficiency and mental health service use among latino  
723 and asian americans with mental disorders. *Med Care*. 2010; 48(12): 1097-1104.
- 724 19. Alegria M, Polo A, Gao S, Santana L et al. Evaluation of a patient activation and empowerment  
725 intervention in mental health care. *Med Care*. 2008; 46(3): 247-256.
- 726 20. Cortes DE, Mulvaney-Day N, Fortuna L, Reinfeld S, Alegria M. Patient--provider communication:  
727 Understanding the role of patient activation for latinos in mental health treatment. *Health Educ Behav*.  
728 2009; 36(1): 138.
- 729 21. Alegría M, Carson N, Flores M, Li X et al. Activation, self-management, engagement, and retention in  
730 behavioral health care: a randomized clinical trial of the DECIDE intervention. *JAMA Psychiatry*.  
731 2014; 71(5): 557-565.
- 732 22. Ault-Brutus A, Lee C, Singer S, Allen M, Alegría M. Examining Implementation of a Patient Activation  
733 and Self-management Intervention Within the Context of an Effectiveness Trial. *Adm Policy Ment Health*.  
734 2014; 41(6): 777-787.

- 735 23. Roter D, Stewart M, Putnam S, Lipkin MJ, Stiles W, Inui T. Communication patterns of primary care  
736 physicians. *JAMA*. 1997; 277(4): 350-356.
- 737 24. Israel BA, Schulz AJ, Parker EA, Becker AB. Review of community-based research: Assessing partnership  
738 approaches to improve public health. *Annu Rev Public Health*. 1998; 19(1): 173-202.
- 739 25. Patel SR, Bakken S, Ruland C. Recent advances in shared decision making for mental health. *Curr Opin*  
740 *Psychiatry*. 2008; 21(6): 606-612.
- 741 26. Smedley B, Stith A, Nelson A. Unequal treatment: Confronting racial and ethnic disparities in healthcare.  
742 Washington, D.C.: National Academies Press; 2003.
- 743 27. Bach PB, Pham HH, Schrag D, Tate RC, Hargraves JL. Primary care physicians who treat blacks and  
744 whites. *N Engl J Med*. 2004; 351(6): 575-584.
- 745 28. Hasnain-Wynia R, Rittner SS. Improving quality and equity in health care by reducing disparities: Chicago,  
746 IL: Northwestern University; 2008.
- 747 29. Hibbard J. Engaging health care consumers to improve the quality of care. *Med Care*. 2003; 41(1):  
748 Supplement I-61 - I-70.
- 749 30. Alegria M, Nakash O, Lapatin S, et al. How missing information in diagnosis can lead to disparities in the  
750 clinical encounter. *J Public Health Manag Pract*. 2008; 14(6): S26-S35.
- 751 31. Alegria M, Sribney W, Perez D, Laderman M, Keefe K. The role of patient activation on patient-provider  
752 communication and quality of care for us and foreign born latino patients. *J Gen Intern Med*. 2009; 24(3):  
753 534-541.
- 754 32. Nakash O, Alegria M. Examination of the role of implicit clinical judgments during the mental health  
755 intake. *Qual Health Res*. 2013; 23(5): 645-654.
- 756 33. Smith RC. Patient-centered interviewing: An evidence-based method. Lippincott Williams & Wilkins;  
757 2001.
- 758 34. Smith RC, Dwamena FC, Grover M, Coffey J, Frankel RM. Behaviorally defined patient-centered  
759 communication—a narrative review of the literature. *J Gen Intern Med*. 2011; 26(2): 185-191.
- 760 35. Smith RC, Lyles JS, Mettler J, et al. The effectiveness of intensive training for residents in interviewing. A  
761 randomized, controlled study. *Ann Intern Med*. 1998; 128(2): 118.
- 762 36. Smith RC, Marshall-Dorsey AA, Osborn GG, et al. Evidence-based guidelines for teaching patient-  
763 centered interviewing. *Patient Educ Couns*. 2000; 39(1): 27-36.
- 764 37. Epstein RM, Franks P, Fiscella K, et al. Measuring patient-centered communication in patient-physician  
765 consultations: Theoretical and practical issues. *Soc Sci Med*. 2005; 61(7): 1516-1528.
- 766 38. Stein T, Kwan J. Thriving in a busy practice: Physician-patient communication training. *Eff Clin Pract*.  
767 1999; 2(2): 63.
- 768 39. Center for Mental Health Services. Shared decision-making in mental health care. Practice, research, and  
769 future directions. Maryland: Substance Abuse and Mental Health Services Administration; 2011.
- 770 40. Davis MH. The effects of dispositional empathy on emotional reactions and helping: A multidimensional  
771 approach. *J Pers*. 1983; 51(2): 167-184.
- 772 41. Ross L, Nisbett RE. The person and the situation: Perspectives of social psychology. New York: McGraw-  
773 Hill; 1991.
- 774 42. Légaré F, Moher D, Elwyn G, LeBlanc A, Gravel K. Instruments to assess the perception of physicians in  
775 the decision-making process of specific clinical encounters: A systematic review. *BMC Med Inform Decis*  
776 *Mak*. 2007; 7(1): 30.
- 777 43. Kriston L, Scholl I, Hölzel L, Simon D, Loh A, Härter M. The 9-item shared decision making questionnaire  
778 (sdm-q-9). Development and psychometric properties in a primary care sample. *Patient Educ Couns*. 2010;  
779 80(1): 94-99.
- 780 44. Scholl I, Kriston L, Dirmaier J, Buchholz A, Härter M. Development and psychometric properties of the  
781 shared decision making questionnaire-physician version (SDM-Q-doc). *Patient Educ Couns*. 2012; 88(2):  
782 284-290.
- 783 45. Eisen SV, Wilcox M, Idiculla T, Speredelozzi A, Dickey B. Assessing consumer perceptions of inpatient  
784 psychiatric treatment. *Jt Comm J Qual Saf*. 2002; 28(9): 510-526.
- 785 46. Kim S, Boren D, Solem S. The Kim alliance scale. *Clin Nurs Res*. 2001; 10(3): 314-331.
- 786 47. Green CA, Perrin NA, Polen MR, Leo MC, Hibbard JH, Tusler M. Development of the patient activation  
787 measure for mental health. *Adm Policy Ment Health*. 2010; 37(4): 327-333.
- 788 48. Zandbelt LC, Smets EMA, Oort FJ, de Haes, HCJM. Coding patient-centered behavior in the medical  
789 encounter. *Soc Sci Med*. 2005; 61: 661-671.

- 790 49. Fassaert T, van Dulmen S, Schellevis F, Bensing J. Active listening in medical consultations: Development  
791 of the active listening observation scale (alos-global). *Patient Educ Couns.* 2007; 68: 258-264.  
792 50. Hall JA, Roter DL, Rand CS. Communication of affect between patient and physician. *J Health Soc Behav.*  
793 1981; 22: 18-30.  
794 51. Roter DL, Hall JA, Blanch-Hartigan D, Larson S, Frankel RM. Slicing it thin: New methods for brief  
795 sampling analysis using rias-coded medical dialogue. *Patient Educ Couns.* 2011; 82: 410-419.  
796 52. Krupat E, Frankel R, Stein T, Irish J. The four habits coding scheme: Validation of an instrument to assess  
797 clinicians' communication behavior. *Patient Educ Couns.* 2007; 62: 38-45.  
798 53. Kroenke K, Spitzer RL. The PHQ-9: a new depression diagnostic and severity measure. *Psychiatric Annals.*  
799 2002; 32(9): 509-515.  
800 54. Spitzer RL, Kroenke K, Williams JBW, Lowe B. A brief measure for assessing generalized anxiety  
801 disorder: The GAD-7. *Arch Intern Med.* 2006; 166(10): 1092-1097.  
802 55. Lish JD, Weissman MM, Adams PB, Hoven CW, Bird H. Family psychiatric screening instruments for  
803 epidemiologic studies: pilot testing and validation. *Psychiatry Res.* 1995; 57: 169-180.  
804 56. Prins A, Ouimette P, Kimerling R, et al. The primary care PTSD screen (PC-PTSD): development and  
805 operating characteristics. *Int J Psychiatry Clin Pract.* 2004; 9(1): 9-14.  
806 57. Van Dam D, Ehring T, Vedel E, Emmelkamp, PM. Validation of the Primary Care Posttraumatic Stress  
807 Disorder screening questionnaire (PC-PTSD) in civilian substance use disorder patients. *J Subst Abuse*  
808 *Treat.* 2010; 39(2): 105-113.  
809 58. Ware Jr JE, Kosinski M, Keller SD. A 12-item short-form health survey: construction of scales and  
810 preliminary tests of reliability and validity. *Med Care.* 1996; 34(3): 220.  
811 59. Utsun TB, Chatterji S, Kostanjsek N, et al. Developing the World Health Organization disability  
812 assessment schedule 2.0. *Bull World Health Org.* 2010; 88(11): 815-823.  
813 60. Brown RL, Rounds LA. Conjoint screening questionnaires for alcohol and other drug abuse: criterion  
814 validity in a primary care practice. *Wis Med J.* 1994; 94(3): 135-140.  
815 61. Graugaard PKRA, Holgersen K, Finset A. Communicating with alexithymic and non-alexithymic patients:  
816 An experimental study of the effect of psychosocial communication and empathy on patient satisfaction.  
817 *Psychother Psychosom.* 2004; 73(2): 92-100.  
818 62. StataCorp LP. 2011. Stata statistical software release 11.0 (release. College station, tx: Stata corporation.)  
819 63. Raudenbush SW, Bryk AS. Hierarchical linear models: Applications and data analysis methods (Vol. 1).  
820 Sage; 2002.  
821 64. Baldwin SA, Wampold BE, Imel ZE. Untangling the alliance-outcome correlation: Exploring the relative  
822 importance of therapist and patient variability in the alliance. *J Consult Clin Psychol.* 2007; 75(6): 842-852.  
823 65. MacKinnon DP, Lockwood CM, Hoffman JM, West SG, Sheets V. A comparison of methods to test  
824 mediation and other intervening variable effects. *Psychol Methods.* 2002; 7(1): 83.  
825 66. Sobel ME Direct and indirect effects in linear structural equation models. *Sociological Methods &*  
826 *Research.* 1987; 16(1): 155-176.  
827 67. Judd CM, Kenny DA. Process analysis estimating mediation in treatment evaluations. *Eval Rev.* 1981;  
828 5(5): 602-619.  
829 68. Shrout P, Keyes K, Ornstein K. Integrating causal analysis into psychopathology research. *Causality and*  
830 *Psychopathology: Finding the Determinants of Disorders and Their Cues* (eds PE Shrout, KM Keyes & K.  
831 Ornstein). Oxford University Press; 2011: 3-24.  
832 69. Norton EC, Wang H, Ai C. Computing interaction effects and standard errors in logit and probit models.  
833 *Stata Journal.* 2004; 4: 154-167.  
834 70. Kronick R, Gilmer T. Insuring low-income adults: Does public coverage crowd out private? *Health Aff.*  
835 2002; 21(1): 225-239.  
836 71. Graubard BI, Korn EL. Predictive margins with survey data. *Biometrics.* 2004; 55(2): 652-659. (117)  
837 72. Davern M, Rodin H, Blewett LA, Call KT Are the current population survey uninsurance estimates too  
838 high? An examination of the imputation process. *Health Serv Res.* 2007; 42(5): 2038-2055.  
839 73. Blewett LA, Davidson G, Bramlett MD, Rodin H, Messonnier ML. The impact of gaps in health insurance  
840 coverage on immunization status for young children. *Health Serv Res.* 2008; 43: 1619-1636.  
841 74. Wells KB, Tang L, Miranda J, Benjamin B, Duan N, Sherbourne CD. The effects of quality improvement  
842 for depression in primary care at nine years. *Health Serv Res.* 2008; 43(6): 1952-1974.  
843 75. Pippins J, Alegria M, Haas J. Association between language proficiency and the quality of primary care  
844 among a national sample of insured latinos. *Med Care.* 2007; 45(11): 1020-1025.

- 845 76. Institute of Medicine & Committee on Health Insurance Status and its Consequences. *America's uninsured*  
846 *crisis: Consequences for health and health care*. Washington, D.C.: The National Academies Press; 2009.  
847
- 848 77. Buka SL. Disparities in health status and substance use: Ethnicity and socioeconomic factors. *Public Health*  
849 *Rep.* 2002; 117(Suppl 1): S118-S125.
- 850 78. Galea S, Ahern J, Tardiff K, et al. Racial/ethnic disparities in overdose mortality trends in new york city,  
851 1990–1998. *J Urban Health.* 2003; 80(2): 201-211.
- 852 79. Iguchi MY, Fain T, Ramchand RN, Bell J. How criminal system racial disparities may translate into health  
853 disparities. *J Health Care Poor Underserved.* 2005; 16(4): 48-56.
- 854 80. Schmid AA. Institutional and Behavioral Economics: Journal Entries for Students and  
855 Colleagues. *Research in the History of Economic Thought and Methodology.* 2007; 25(B): 129.
- 856 81. Wills CE, Holmes-Rovner M. Integrating decision making and mental health interventions research:  
857 Research directions. *Clinical Psychology.* 2006; 13(1): 9-25.
- 858 82. Hill CE, Corbett CA. A perspective on the history of process and outcome research in counseling  
859 psychology. *J Couns Psychol.* 1983; 40: 3-24.
- 860 83. Morales, L.S., Cunningham, W.E., Brown, J.A., Liu, H., & Hays, R.D. Are latinos less satisfied with  
861 communication by health care providers? *J Gen Intern Med.* 1999; 14(7): 409-417.
- 862 84. Johnson RL, Saha S, Arbelaez JJ, Beach MC, Cooper LA. Racial and ethnic differences in patient  
863 perceptions of bias and cultural competence in health care. *J Gen Intern Med.* 2004; 19: 101-110.
- 864 85. Cooper LA, Beach MC, Johnson RL, Inui TS. Delving below the surface. Understanding how race and  
865 ethnicity influence relationships in health care. *J Gen Intern Med.* 2006; 21(1): 21-27.
- 866 86. Rosen DC, Miller AB, Nakash O, Halperin L, Alegria M. Interpersonal complementarity in the mental  
867 health intake: A mixed-methods study. *J Couns Psychol.* 2012; 59(2): 185-196.

868

869

870

871
